# Supplementary material
Source: MDPI journal article supplement (https://www.mdpi.com/2673-4532/1/1/3)
Supplement: s1 [file s1]

## Supplementary Materials

### Response Surface

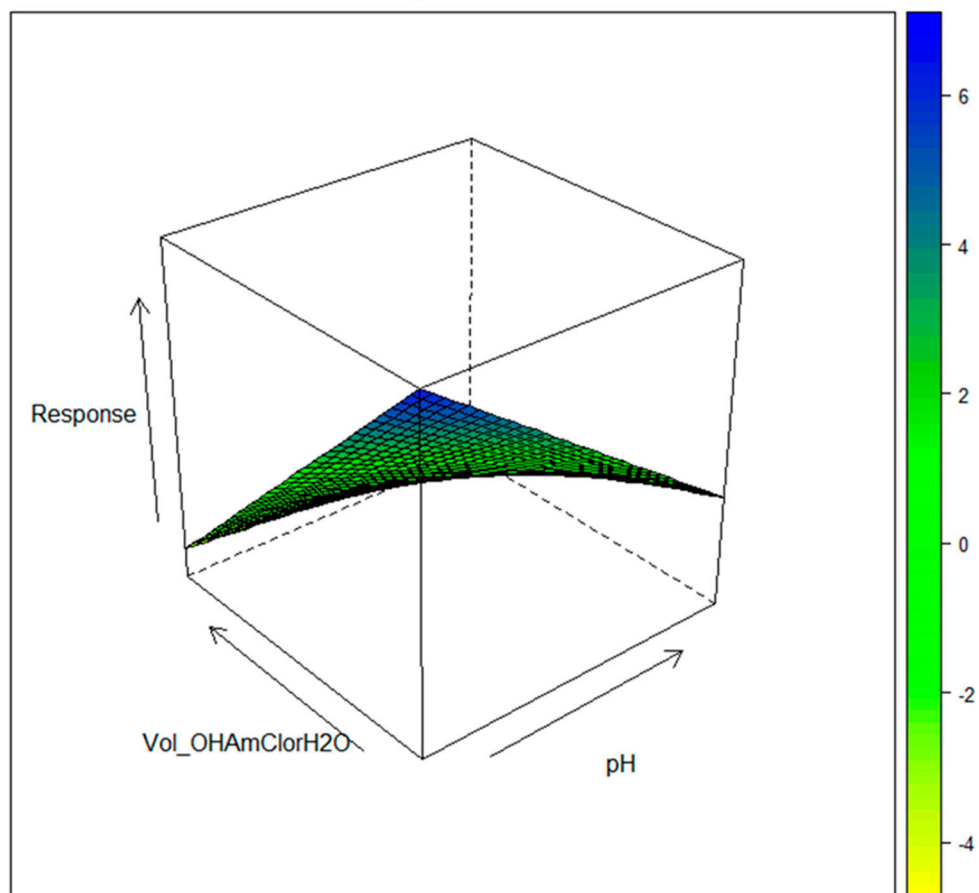

**Figure S1** Contour plot of the full-factorial DoE: 2-D response surface plots for the first two factors of the DoE

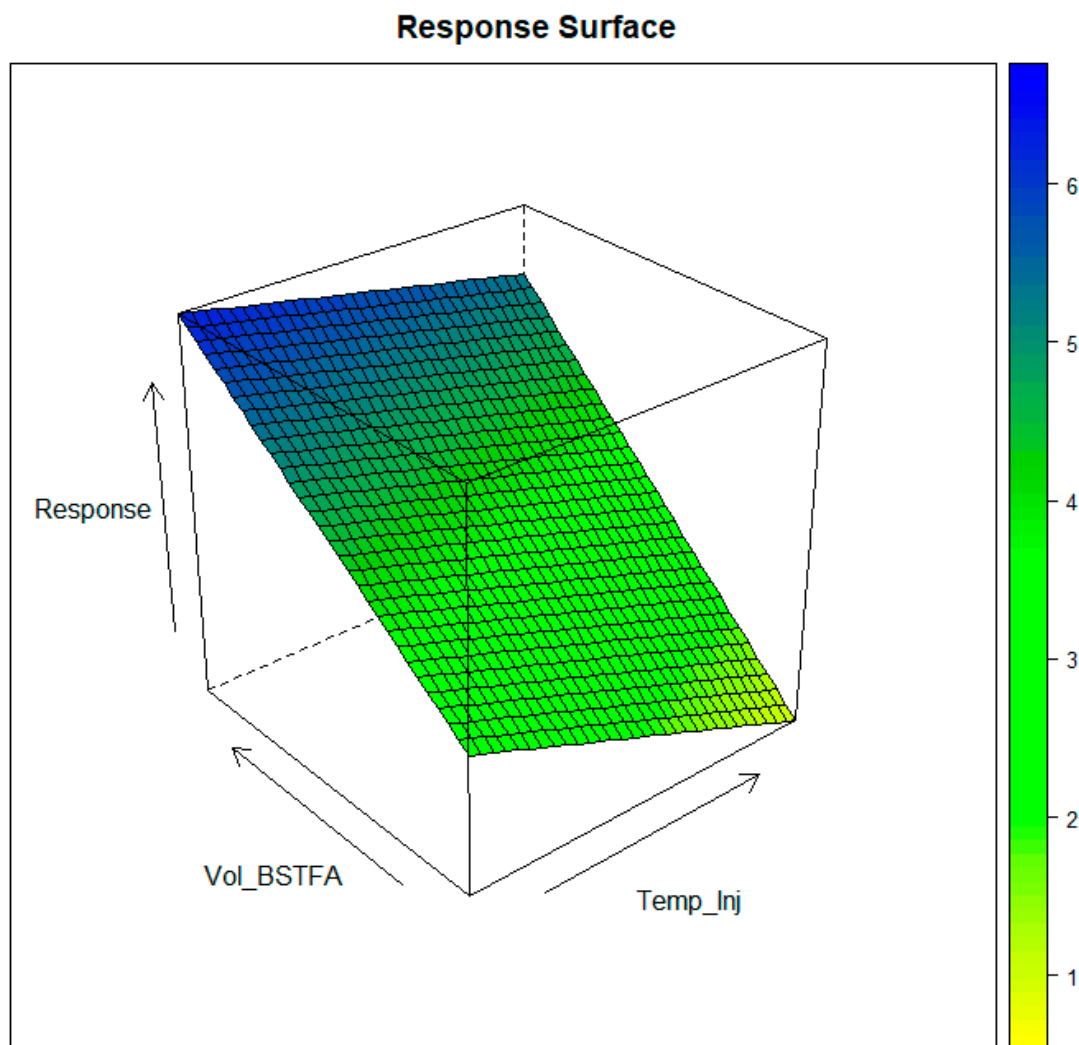

**Figure S2** Contour plot of the full-factorial DoE: 3-D response surface plots for the second two factors

**Table S1** Analyte name and response (peak area) for each experiment

| ANALYTES/EXPERIMENT               | 3        | 11       | 14       | 4        | 13       | 8        | 7        | 5        | 10       | 6        | 2        | 9        | 16       | 1        | 12       | 15       |
|-----------------------------------|----------|----------|----------|----------|----------|----------|----------|----------|----------|----------|----------|----------|----------|----------|----------|----------|
| INTERNAL STANDARD                 | 11014    | 10639    | 10014    | 11054    | 9982     | 10307    | 11123    | 10280    | 10186    | 11383    | 11154    | 11324    | 10808    | 11209    | 10668    | 10855    |
| 3-HYDROXYISOVALERIC ACID          | 535831   | 597837   | 692458   | 847329   | 552036   | 788120   | 622532   | 520860   | 439440   | 836021   | 945162   | 1853732  | 583526   | 518740   | 558658   | 854602   |
| METHYLMALONIC ACID                | 14523753 | 13901001 | 13404329 | 14112666 | 13819681 | 13818179 | 14095243 | 14275975 | 13703759 | 15131382 | 15007565 | 14801712 | 13841652 | 15007579 | 14018510 | 14587748 |
| 4-HYDROXYBUTYRIC ACID             | 504023   | 798660   | 566299   | 565100   | 542902   | 636300   | 468535   | 604845   | 497992   | 740585   | 773628   | 791437   | 708913   | 513147   | 545165   | 801215   |
| ETHYLMALONIC ACID                 | 6319166  | 5960874  | 5644648  | 5944483  | 5717947  | 5784049  | 6058733  | 6006072  | 5847179  | 6507768  | 6240931  | 6349558  | 6007100  | 6331588  | 5954800  | 6146519  |
| FUMARIC ACID                      | 28644452 | 23085269 | 27717060 | 28385127 | 28388197 | 26681758 | 26855023 | 28677974 | 26390965 | 25509178 | 34505974 | 32333719 | 22712165 | 31467075 | 26619320 | 24720562 |
| MEVALONOLACTONE                   | 2508855  | 2339504  | 5034814  | 4444637  | 5063234  | 4049418  | 3578024  | 5502933  | 3788238  | 4483734  | 6579938  | 12060542 | 4459884  | 6237959  | 4949775  | 4997173  |
| GLUTARIC ACID                     | 16416563 | 15605303 | 15278685 | 16651537 | 15321956 | 15683213 | 16087025 | 15935934 | 14898477 | 16583719 | 17036411 | 17299031 | 15659911 | 16989748 | 15600234 | 15625696 |
| 3-METHYLGLUTARIC ACID             | 12732636 | 12048422 | 11445246 | 12564604 | 11452889 | 11832017 | 12517353 | 11883049 | 11530420 | 12900866 | 12564502 | 12945234 | 12064372 | 12786513 | 12152959 | 12235491 |
| 3-METHYLGLUTACONIC ACID (2 peaks) | 551260   | 506621   | 502818   | 595407   | 495857   | 515377   | 559438   | 531002   | 499830   | 581727   | 558912   | 598779   | 522145   | 563184   | 558292   | 514651   |
| ADIPIC ACID                       | 45350677 | 43408289 | 41508765 | 45157343 | 41206413 | 42328796 | 44759782 | 42694404 | 41215326 | 46241235 | 45289246 | 46439834 | 43416752 | 46249795 | 43335593 | 43632911 |
| PYROGLUTAMIC ACID                 | 23485804 | 24611086 | 23589985 | 23092161 | 28761196 | 21889127 | 20066131 | 21807596 | 23535120 | 19304587 | 23741254 | 33211007 | 21067173 | 20901408 | 13489602 | 11884337 |
| TIGLYL GLYCINE                    | 2572449  | 2459769  | 2386632  | 2637168  | 2415660  | 2466830  | 2620082  | 2516294  | 2396434  | 2724314  | 2626850  | 2602982  | 2514268  | 2743270  | 2522316  | 2545432  |
| 2-HYDROXYGLUTARIC ACID            | 15976503 | 15669039 | 18694411 | 19867086 | 18714419 | 19405870 | 15852490 | 19309107 | 15022661 | 17485370 | 21738239 | 22498904 | 15462946 | 20384705 | 15799346 | 16343958 |
| 3-HYDROXY-3-METHYLGLUTARIC ACID   | 793800   | 439916   | 479365   | 585447   | 593963   | 507833   | 482836   | 595626   | 423480   | 761192   | 706942   | 712877   | 385564   | 558424   | 435517   | 484738   |
| KETOGLUTARIC ACID                 | 7563173  | 9452024  | 9180576  | 8631666  | 9147437  | 9567635  | 9268733  | 9679310  | 9030662  | 9798703  | 9562009  | 10493043 | 9506899  | 9251291  | 9482598  | 9925458  |
| HEXANOYL GLYCINE                  | 1886997  | 1812183  | 1732035  | 1928074  | 1734910  | 1791560  | 1968378  | 1805528  | 1785856  | 1996711  | 1884293  | 1965969  | 1892547  | 2001035  | 1882797  | 1854025  |
| N-ACETYLASPARTIC ACID             | 28170    | 38458    | 57448    | 59422    | 60440    | 65647    | 53814    | 65952    | 46628    | 49469    | 60274    | 67959    | 48631    | 57682    | 56141    | 49422    |
| SUBERIC ACID                      | 23045303 | 22201147 | 20844565 | 22779082 | 20670373 | 21469457 | 23094937 | 21494602 | 21261172 | 23413329 | 22667194 | 23169579 | 22095369 | 23353489 | 22152234 | 22158008 |
| 2-METHYLCITRIC ACID               | 255993   | 249938   | 245617   | 285280   | 139156   | 181845   | 246109   | 110698   | 109750   | 193019   | 150173   | 330959   | 206565   | 149673   | 154647   | 157784   |
| SEBACIC ACID                      | 10041362 | 9722459  | 9175723  | 10250561 | 9094438  | 9412406  | 10283957 | 9427157  | 9387943  | 10476921 | 10145000 | 10290291 | 9746589  | 10374745 | 9681937  | 9823261  |
| VANILLACTIC ACID                  | 81137498 | 76199812 | 71080277 | 80120187 | 73590444 | 72143109 | 80871436 | 76494098 | 74411354 | 82966049 | 34116362 | 17976372 | 77653501 | 83465175 | 74643280 | 77062662 |

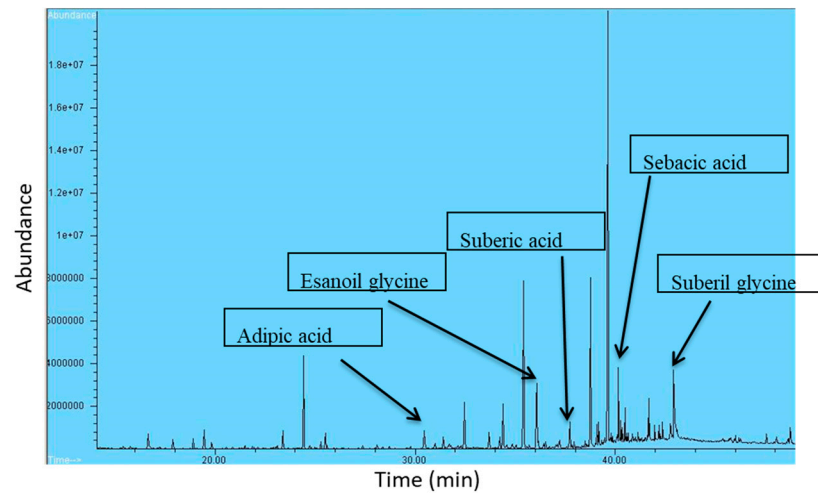

**Figure S3** example of a chromatogram obtained in case of a pathological patient

This chromatogram is significant to diagnose MCADD: Medium-Chain Acyl-Coenzyme A Dehydrogenase Deficiency. The Medium-Chain Acyl-Coenzyme A Dehydrogenase is one of the enzymes involved in mitochondrial fatty acid  $\beta$ -oxidation and in particular in the oxidation of medium chain fatty acids. For this reason, in the chromatogram of a person affected by MCADD, all these medium chain fatty acids and their correspondent acylglycines are very high.
